# Supplementary material for: An Extract of Pomegranate Fruit and Galangal Rhizome Increases the Numbers of Motile Sperm: A Prospective, Randomised, Controlled, Double-Blinded Trial
Source: PLoS One. 2014 Oct 2;9(10):e108532. doi: 10.1371/journal.pone.0108532 (PMC4190413; doi:10.1371/journal.pone.0108532)
Supplement: Background Data S1 — The raw background data. (XLS) [file pone.0108532.s003.xls]

## Sheet: Conc. + motility
Participant	Volume ejac. 1	Sperm conc. ejac. 1	Motile/mL ejac. 1	Volume ejac. 2	Sperm conc. ejac. 2	Motile/mL ejac. 2	Volume ejac. 3	Sperm conc. ejac. 3	Motile/mL ejac. 3	Volume ejac. 4	Sperm conc. ejac. 4	Motile/mL ejac. 4	Volume ejac. 5	Sperm conc. ejac. 5	Motile/mL ejac. 5
1	2.6	20	5	3	18	4	2.5	21	8	2.9	15	4	3	18	6
2	2.1	1	0	2.5	2	1	2	3	1.5	2.5	5	2
3	2.5	4	2	2.4	4	1	2.5	1	0.2	2.6	8	4.5	2.7	7	3
4	3	21	15	3.1	50	25	3	30	17	3.2	33	18	3.5	40	20.5
5	3	40	26.4	3.6	34	21	3	45	29	3.5	60	24	3.5	74	34
6	4	13	8.2	3.6	8	5	4.1	8	5	3.6	30	16	4	38	25
7	2.4	18	9	2.9	20	10	3.1	18	11	2.5	14	5	2.9	15	6
8	4.5	32	16	4.2	40	22	4.2	41	19	4	39	15	4.1	42	23
9	3	16	10	3.1	14	4.5	3	15	7.5	3.1	16	8	2.9	18	10
10	3.4	19	11	3.5	20	13.5	3.5	24	12	3.2	15	10	3.5	19	13
11	3.6	6	4	3.5	11	7.5	3.5	6	3	3.4	19	12	3.5	13	9
12	2	5	2	2.1	4	1	1.9	6	2.5	2	10	4	2	8	3
13	3.9	40	18	4	28	10	4.1	20	5	4	70	38	3.9	67	26
14	2	25	10	2	27	15	2.3	23	11	2.1	25	10	2	22	12
15	3.2	26	12	3	9	3	3	11	5	3.1	40	25	3	39	20
16	4.5	28	9	4.7	13	0	4.2	21	5	4.5	34	11	4.6	65	31
17	1.3	4	1	1	13	6	1.1	24	6	1.3	10	2	1.1	19	8
18	2.8	4	1.2	3.1	2	0	2.7	3	0.6	3.2	3	0.4	3.1	2	0.5
19	2.1	5.2	0.2	3.2	6	0.2	2.7	4.2	1	4.6	6.4	0.4	1.5	0.4	0.1
20	1.2	1	0	1.6	0.9	0	1	1	0	1.9	0.9	0	2.3	1.1	0.1
21	5.1	32	25	4.5	40	25	4.3	43	27	5.3	73	35	4.9	67	40
22	3.8	33	12	3.2	34	13	3.5	33	16	4.2	30	10	3.5	36	12
23	1.9	1	0	1.5	3	1	2	2	1	1.9	1	0	2.1	4	1
24	2.5	4	1	3.1	6	2	2.5	4	2	2.6	6	2	2.9	4	2
25	4.6	17	4	4.9	13	2	5	10	2	4.7	18	5	4.9	11	3
26	3.5	21	7	3.9	20	7	4.2	25	10	3.8	17	5	4.2	15	5
27	2.5	33	15	2.4	40	18	2.1	35	17	2.5	59	28	2.5	60	30
28	1.9	24	6	2.3	26	9	2	20	9	2	24	6	2.1	21	6
29	3	1.1	0	2.9	1.2	0.5	2.8	1.2	0	3	1	0	2.4	1.3	0.4
30	6.2	7	1	6	3	0.1	6.3	6	2	6.6	4	2	5.6	9	2
31	5.1	13	10	4.8	15	12	5.5	20	12	4.9	15	8	5.4	17	11
32	2.5	8	2	2.9	19	6	2.5	7	2	2.8	16	6	2.9	7	3
33	4.5	10	5	5	8	3	4.8	8	3	4.9	11	7	4.7	10	6
34	2.9	6	1	3.5	7	2	3.2	4	1	3.5	9	3	3	10	4
35	3	14	4	3.1	16	5	3	15	9	3.1	17	9	2.9	5	2.2
36	3.5	4	0.1	3.2	7	2	3.5	10	3	3.8	5	3	3.6	8	4
37	4	5	2	3.8	6	2	4.2	5	2	4.9	9	2	3.9	6	2
38	1.7	40	21	2.8	37	13	2	31	12	1.9	55	27	2.9	78	30
39	3.8	1	0.2	4.3	1	0.3	3.7	1	0.3	4.1	6	3	3.8	5	2
40	3.5	6	3	3.6	11	3	3.8	9	3	3.8	10	2	3.9	11	4
41	3.5	1	0	2.8	4	2	3.2	1	0.1	2.9	9	4	3.7	16	7
42	3.2	5	2	4	5	2	3.6	6	2	2.9	0.3	0.1	4.7	0.9	0.5
43	3	1.1	0.2	3.3	1.4	0.3	2.9	1.2	0.4	3.3	1.5	0.3	3.1	0.7	0.2
44	3.2	40	26	2.5	39	25	3.1	46	24	2.6	43	20	3.1	32	19
45	2	20	10	2.5	41	23	2.6	40	15	2.2	22	10	2.5	34	24
46	3.3	22	10	4.8	20	6	4.9	21	7	5.2	18	9	3.2	20	7
47	4.8	4.5	1.5	4.5	5.1	1.1	3.8	5.1	1.1	3.9	5.3	1	4.3	4.6	1.6
48	2	22	6	2.1	26	6	2.1	24	5	2.5	26	7	3.5	19	7
49	4.1	1.9	0.9	4.2	2.5	1	2.4	1.6	0.5	2.9	1.9	0.9	3.9	11	3
50	1	1.3	0.3	1.2	1.4	0.2	1.5	1	0.3	1.7	0.6	0.4	1.1	1.5	0.5
51	6.1	11	7	6.5	16	10	6.3	14	9	5.9	13	7	6.4	12	8
52	1.2	3.2	1.2	2.7	6	2	2.1	9	3	1.8	5.7	3.2	2.3	9	5
53
54	2.9	21	10	3.9	19	9	3.4	14	5	3	26	11	3.7	27	12
55
56	0.9	15	6	1.9	12	2	1	9	2	1.7	16	3	1.1	18	5
57	3.6	12	7	3.1	20	9	2.6	17	8	3.2	20	9	3.1	15	8
58	4.9	15	8	3.8	11	5	4	14	5	4.6	20	8	4.2	18	7
59	2.5	20	10	2.4	28	15	2.4	29	18	2.5	20	10	2.4	31	19
60	1.7	20	3	1.8	21	4	2	19	4	1.8	27	7	2.1	26	6
61	3.7	20	5	3.3	27	3	3.3	20	4	3.5	27	15	2.6	25	17
62	3	27	2	2.7	23	3	3	25	2	2.8	27	2	3.2	25	1
63	5.5	21	9	5.1	19	9	5.4	20	8	5.9	25	9	5	26	11
64	2	23	2	2.6	30	2	2.1	25	3	2	32	4	2.1	30	3
65	3	13	7	2.3	13	4	3.1	23	14	3.3	33	22	2.7	25	19
66	3.2	16	4	3.8	17	5	3.5	16	4	3.7	21	5	3.4	22	8
67
68	1.2	21	9	2.6	19	10	3	27	9	2.3	18	8	2.7	28	9
69	2	1.8	0.5	2.5	1.7	0.7	2.4	1.5	0.5	1.9	2	1	1.6	3.7	0.7
70

## Sheet: Questionnaire
Participant	Smoking	Cups of coffee/day	Alcohol units/week	Exposed to toxins at work	Fruit and greens/day	Vitamins and minerals	Stress	Hot baths	Sauna	Biking more than 10 km	Boxershorts	Other lifestyle factors possibly affecting semen quality	Chronic illness	Previously operated for hernia or on genitals	Testicles in scrotum in childhood	Mumps	Former trauma on the genitals	Chemotherapy	Hereditary illness in the family	Infections or conditions possible affecting the semen quality	Medicine	Previous fertility treatment	Impregnated a female	Children	Height	Weight	Other		Kommentar: Jeg har indsat et ekstra n i fanens titel (Questionnaire)
1	No	0-2	0	None	Fruit 0-5 + 250g salad	No	No	No	No	No	Tight	?	Asthma /allergy	No	Yes	No	No	No	No	No	Symbicort	No	1 time	0	170 cm	84kg
2	10	3	15	None	Fruit 1 + 100g salad	No	Weekly	No	3/year	No	Tight	Computer in lap	No	Hernia	Yes	No	No	No	No	No	No	No	No	0	170cm	61kg
3	No	None	10	None	Fruit 1.5 + 150g salad	Fish oil + vitamin tablet	Often stressed	No	No	No	Tight	Tight pants + computer in lap	No	No	Yes	No	No	No	Epilepsia	No	No	No	No	0	184cm	72kg
4	No	2	0	None	Fruit 3 + 300g salad	B-vitamin	Daily	No	No	No	Tight	Mother exposed to pesticides during childhood	No	No	Yes	No	No	No	No	No	No	No	No	0	181cm	81kg
5	No	4-5	25	None	Fruit 1 + 200g salad	c-vitamin, d-vitamin, eye Q	No	No	No	No	Tight	No	Allergy	No	Yes	No	No	No	No	No	No	No	2 times	2	187cm	85kg
6	10-15	None	15	None	Fruit 3 + 150g salad	Fish oil + vitamin tablet	No	No	No	No	Tight	No	No	Yes	Yes	No	No	No	No	No	No	No	No	0	180cm	66kg	Has only one testicle
7	No	None	4	None	Fruit 2 + 200g salad	No	Monthly	No	No	No	Tight	Computer in lap	No	No	Only one	No	No	No	No	No	No	No	No	0	183cm	75kg
8	No	None	20	None	Fruit 3 + 200g salad	No	No	No	No	Yes	Loose and tight	No	No	No	Yes	No	No	No	No	No	No	No	No	0	183cm	70kg
9	No	None	5-8	None	Fruit 1-3 + 100-150g salad	No	Weekly	No	5-8/year	6 km/day	Loose	No	Asthma and mild psoriasis	No	Yes	No	No	No	Mild psoriasis	No	Asthma medicine and creme with steorid	No	No	0	180cm	67kg
10	No	0,5	15	None	Fruit 1 + 100g salad	No	No	No	No	No	Tight	Computer in lap	No	No	Yes	No	No	No	No	Chlamydia in more than 150 days at age 17	No	No	No	0	187cm	93kg
11	No	4	7	None	100g salad	No	Sometimes	No	No	No	Loose and tight	Phone in pocket	No	No	Yes	No	No	No	No	No	No	No	No	0	180cm	83kg
12	10	2	10	None	Fruit 0.5 + 100g salad	No	Monthly	No	No	No	Loose	Bad diet + much alcohol in weekends	Urticaria	No	Yes	No	No	No	No	Chlamydia 7-12 times	Alnok 10 mg	No	No	0	182cm	74kg
13	4-6 +marihuana a few times/week	1	0	None	Fruit 2-3	No	No	No	No	No	Tight	No	No	Yes	Yes	Yes	No	No	No	No	Aciclovir	No	4 times	0	176cm	70kg
14	No	10	25	None	0	No	No	No	No	No	Loose	No	No	Yes	Yes	Yes	No	Cancer, one testicle removed, chemo	No	No	No	No	No	0	185cm	95kg
15	No	None	yes	None	Fruit 1+ 50g salad	Zinc, selenium and pomegranate juice	No	No	No	No	Tight	No	No	No	Yes	No	No	No	No	No	No	No	2 times	0	190cm	96kg
16	20	1	0	None	0	Pikasol	No	No	No	No		No	No	No	Yes	No	No	No	Rheumatism	No	No	No	1 time	1	185cm	95kg
17	No	None	0	None	Fruit 4-6 + 100g salad	No	No	No	No	No	Loose and tight	Poor immune system	No	No	Yes	No	No	No	No	No	No	No	No	0	185cm	63kg
18	No	3	2	None	Fruits 3	No	No	No	No	No		No	No	Yes	Yes	No	No	No	No	No	Medicine for increased blood pressure	No	2 times	1	188cm	90kg
19	No	3	10-20	None	Fruit 1-2 + 100g salad	No	Monthly	Monthly	2/year	No	Semi tight	Computer in lap	No	No	Yes	No	No	No	No	No	No	No	No	0	184cm	72kg
20	15	3-4	4-5	None	Fruit 2 + 50g salad	No	No	No	No	2x30 km/week	No	Previously working with metals	No	No	Yes	No	No	No	No	No	No	No	1 time	1	183cm	82kg
21	20	None	0	None	Fruit 1 + 50g salad	No	No	No	No	No	Tight	No	No	No	Yes	Yes	No	No	No	No	No	No	No	0	181cm	105kg
22	No	None	0	None	Fruit 0.5 + 50g salad	No	Yes	No	No	Yes	Tight	No	No	No	Yes	No	No	No	No	No	Omeprazol 1/day	No	No	0	187cm	120kg
23	No	4	2	None	Fruit 3 + 100g salad	No	No	No	No	2x30 km/week	Tight	No	No	No	Yes	No	No	No	No	No	No	1 child by ICSI	1 time	1	186cm	68kg
24	No	1	2-3	None	Fruit 2	Vitamin tablet	Weekly	No	No	Yes	Loose	No	No	Yes	Yes	No	No	No	No	No	No	No	1 time	1	192cm	89kg
25	No	2	0	None	Fruit 2 + 100g salad	No	No	No	No	No	Loose	No	No	No	Yes	No	No	No	No	No	Amlodipin + Enalapril + Simvastatin	No	No	0	180cm	122kg
26	No	None	yes	None	Fruit 2 + 100g salad	No	No	No	No	Yes	Loose and tight	No	No	No	Yes	No	No	No	No	No	No	No	No	0	187cm	85kg
27	No	None	6	None	Fruit 2 + 50g salad	Magnesium+ C og D-vitamin	Daily	No	No	No	Loose and tight		No	No	Yes	No	No	No	Diabetes and Psoriasis	No	Zymelin	No	1 time	1	176cm	80kg
28	No	None	5-7	None	Fruit 2 + 50g salad	No	No	No	No	No	Loose	Depression?	No	No	Yes	No	No	No	No	No	No	No	No	0	174cm	64kg
29	No	None	0	None	Fruit 3-4 + 100g salad	Fish oil + vitamin tablet	No	No	No	60-180 km 2-3 times per week	Tight	High intake of sugar during training	Hay fever and asthma	Yes	Yes	No	No	No	No	No	Symbicort	No	No	0	178cm	77kg
30	No	5	12	None	Fruit 1 + 50g salad	Fish oil + vitamin tablet + B-vitamin	Weekly	No	No	No	Tight	Accident during soccer	Asthma	Yes	Yes	No	No	No	No	No	Pulmicort + bricanyl	No	1 time	1	185cm	90kg
31	No	None	0	None	Fruit 2	No	No	No	No	No	Tight	No	No	No	Yes	No	No	No	No	No	No	No	No	0	195cm	92kg
32
33	No	3	0	Works with galvanization and rustless pipes	Fruit 1 + 200g salad	Vitamin tablet	Weekly	No	No	No	Tight	Works with galvanization and rustless pipes	No	No	Yes	No	No	No	No	No	No	Yes	1 time	1	185cm	81kg
34	No	10	2	None	200-400g greens	Vitamin tablet	Weekly	No	No	No	Loose	No	No	No	Yes	Yes	No	No	No	Gout and erysipelas	No	Micro insemination	1 time	1	184cm	135kg
35	No	2	8	None	Fruit 1 + 100g salad	No	Often	No	No	No	Loose and tight	No	No	No	Yes	No	No	No	No	No	No	No	No	0	185cm	77kg
36	5/month	1	8	None	Fruit 3 + 150g salad	Fish oil + vitamin tablet	No	No	2/month	30 km once a week	Loose and tight	No	No	No	Yes	No	No	No	No	No	No	No	No	0	179cm	76kg
37	No	1	0	None	Fruit 2 + 50g. salad	Multivitamin	Almost daily	No	No	No	Mostly tight	No	Chronic pancreatitis	Yes	Yes		Yes	No	No	Pancreatitis	Pamol, dolol, creon, emperal, lanzoprazol	No	3 tmes	0	184 cm	92 kg
38	No	6	5	None	Fruit 1-2 + 300g greens	No	Weekly	No	No	No	Mostly tight	No	No	Yes	Yes	No	No	No	Alzheimers disease and sclerosis	Parents experiencing difficulties in concieving	No	No	1 time (IVF)	1	180 cm	77 kg
39	No	None	4	None	200g salad	Vitamin tablet + B- and D-vitamin	No	No	No	No	Loose and tight	No	No	No	Yes	Yes	No	No	No	No	No	No	No	0	195 cm	97 kg
40	No	None	0	None	None or very little	No	Rarely	No	No	2x6 km/day	Tight	No	No	No	Yes	No	No	No	No	No	No	No	Yes	1	185 cm	94 kg
41	No	6	6	None	Fruit 2/week + 50g salad/day	Vitamin tablet	Weekly	No	No	No	Mostly tight	No	No	No	Yes	No	No	No	No	No	No	No	1 time	1	192 cm	82 kg
42	No	1	0	None	Fruit 1 + 200g greens	Vitamin tablet	No	No	1/month	No	Tight	No	No	No	Yes	No	No	No	Chromasomal failure on chromosome 13 and 14	Chromasomal failure on chromosome 13 and 14	No	No	5 times	3	184 cm	100 kg
43	No	2	0	None	Fruit 1 + 50g salad	Fish oil + vitamin tablet	Almost daily	No	No	No	?	No	No	No	Yes	No	No	No	No	No	No	No	No	0	175 cm	102 kg
44	No	7	0	None	Fruit 2-3 + 200g salad	Vitamin tablet	No	No	No	No	Loose	No	No	No	Yes	No	No	No	No	No	No	No	No	0	182 cm	115 kg
45	Cannabis 1/week	Max. 1	7	None	400 - 500 g	Fish oil + vitamin tablet	Monthly	No	No	No	Mostly tight	Little sleep and exercise	No	No	Yes	No	No	No	No	No	No	No	No	0	178 cm	76 kg
46
47	No	3	2 - 4	None	Fruit 0-½ stk + 300-600g greens	Vitamin tablet + D-vitamin	Sometimes weekly	No	No	No	Tight	Phone in pocket	Multiple allergy	No	Yes	No	No	No	No	No	No		No	0	189 cm	83 kg
48	No	None	0	None	Fruit 1 + 200-300g greens	No	Under pressure, but not stressed	No	No	No	Tight		No	No	Yes	No	No	No	No	No	No	No	2 times	1	186 cm	89 kg
49	No	None	0	None	Fruit 2-3 + 300g greens	Calcium, iron	No	No	No	No	Loose and tight	No	No	No	Yes	No	No	No	No	No	No	No	No	0	187 cm	85 kg
50	20	3	0	None	Fruit 4-5 + 100-150g greens	No	Monthly	No	No	No	Tight	No	No	No	Yes	No	No	No	No	No	No	No	1 time	1	187 cm	113 kg
51	No	1 - 2	10 - 15	None	Fruit 1-2 + 200-300g greens	Fish oil + vitamin tablet + caffeine + BCAA + proteins + maltodextrin	Weekly	No	No	Rarely	Loose and tight	No	No	No	Yes	No	No	No	No	Chlamydia 3 times	No	No	No	0	183 cm	93 kg
52	4 - 6	15	0	None	Fruit 2-3	Fish oil + vitamin D and E	No	No	Rarely	No	Loose	No	No	Yes	Yes	No	No	No	Diabetes 2	No	Unreadable	No	No	0	180 cm	92 kg
53
54	No	2/week	5	None	Fruit 1 + 100g salad	Vitamin tablet	Weekly	No	No	No	Tight	Phone in pocket and computer in lap	No	No	Yes	No	No	No	No	No	No	No	1 time	0	184 cm	84 kg
55
56	No	2 - 4	0	None	Fruit 1 + 100-200g greens	Vitamin tablet	No	Monthly	No	No	Tight	No	No	Yes	Yes	No	No	No		No	Lansoprazol daily	No	No	0	176 cm	82 kg
57	No	2	6	None	100g fruit and greens	No	No	No	No	No	Loose and tight	No	No	No	Yes	No	No	No	No	No	No	No	No	0	176 cm	71 kg
58	No	None	3	None	Fruit ½ + 200g salad	Vitamin tablet	Monthly	No	No	No	Loose	Phone in pocket	No	No	Yes	Yes	No	No	No	Severe incidence of mumps in childhood	Allergy medicine	No	No	0
59	No	None	5	None	Ca. 250g	Creatine and proteins	Weekly	No	No	Yes	Tight	Computer in lap	No	No	Yes	No	Yes	No	No	Trauma of the testicles	No	No	No	0	192 cm	90 kg
60	No	None	1 - 15	None	Min. 600g fruit and greens	Yes	Nej	No	No	Mountainbikes 1-2 h/week	Loose	Often sweating	No	No	Yes	No	No	No	No	No	No	Acupuncture	No	0	173 cm	85 kg
61	No	6	5	None	Daily greens	No	Rarely	No	No	No	Tight	No	No	No	Yes	No	No	No	No	No	No	No	1 time	1	182 cm	95 kg
62	No	None	8 - 10	None	Fruit 1	No	Weekly	No	No	No	Loose and tight	Ex-smoker and parents smoked	Asthma	Hernia	Yes	No	Yes, as every boy	No	No	No	No	No	No	0	185 cm	76 kg
63	No	10 - 15	0	None	Fruit 1-3 + 200g salad	No	Sometimes	No	No	No	Loose	Solarium	Psoriasis	No	Yes	No	No	No	No	No	No	No	1 time	0	179 cm	83 kg
64	17	None	0	Is a mechanic and works daily with paint, oil and rust-remover	Fruit 1 + occasionally salad	Vitamin tablet	Weekly	No	No	Monthly	Tight	High BMI	No	No	Yes	No	No	No	No	No	No	No	No	0	185 cm	112 kg
65	No	None	8	None	200-300g greens	Vitamin tablet	No	No	No	No	?	No	No	No	Yes	No	No	No	No	No	Hay fever medicine during summer	No	No	0	187 cm	88 kg
66	No	1 - 2	1	None	Fruit 1-2 + 50g greens	Vitamin tablet + fish oil, zinc, Q10, calcium, blueberry extract	Monthly	No	No	15 km/day	Mostly tight	Previously Propecia against hair loss	No	Circumcised	Yes	No	No	No	No	No	No	No	No	0	186 cm	78 kg
67
68	No	10	0	None	Fruit 2 + 100g salad	No	No	No	No	No	Loose and tight	No	No	No	Yes	No	No	No	No	No	No	No	No	0	190 cm	96 kg
69	No	3	1	None	2 - 5	Fish oil	No	No	1-2/week	Weekly	Tight	No	No	No		No		No	No	Chlamydia during 3 years	Rheumatism medicine	No	No	0	198 cm	100 kg
70

## Sheet: Compliance
Participant	Total number of days with tablet intake	Expected use of tablets (white/green)	Tablets taken (white/green)	Tablets not taken (white/green)	Tablets left in the bottle (white/green)
1	82	328/328	316/317	12/11	44/43
2	90	360/360	250/253	110/107	110/107
3	86	344/344	307/305	37/39	53/55
4	83	332/332	329/330	3/2	31/30
5	90	360/360	334/334	26/26	26/26
6	90	360/360	354/348	6/12	6/12
7	88	352/352	342/342	10/10	18/18
8	90	360/360	347/346	13/14	13/14
9	90	360/360	286/284	74/76	74/76
10	84	336/336	308/302	28/34	52/58
11	89	356/356	314/336	42/20	46/24
12	90	360/360	300/300	60/60	60/60
13	79	316/316	256/258	60/58	104/102
14	88	352/352	329/336	23/16	31/24
15	90	360/360	352/352	8/8	8/8
16	82	328/328	314/314	14/14	46/46
17	82	328/328	323/320	5/8	37/40
18	90	360/360	360/360	34/37	34/37
19	90	360/360	360/360	36/31	36/31
20	90	360/360	360/360	87/87	87/87
21	90	360/360	360/360	32/32	32/32
22	82	328/328	328/328	0/0	32/32
23	90	360/360	360/360	0/0	0/0
24	90	360/360	360/360	76/76	76/76
25	83	332/332	323/323	9/9	37/37
26	90	360/360	341/341	19/19	19/19
27	90	360/360	264/264	96/96	96/96
28	90	360/360	356/355	4/5	4/5
29	90	360/360	360/360	0/0	0/0
30	89	356/356	318/318	38/38	42/42
31	82	328/328	297/301	31/27	63/59
32	83	332/332	336/336	0/0	24/24
33	89	356/356	357/358	0/0	3/2
34	88	352/352	360/360	0/0	0/0
35	87	348/348	316/316	32/32	44/44
36	90	360/360	302/303	58/57	58/57
37	86	344/344	345/345	0/0	15/15
38	90	360/360	321/328	39/32	39/32
39	90	360/360	360/360	0/0	0/0
40	86	344/344	294/294	50/50	66/66
41	82	328/328	232/232	96/96	128/128
42	90	360/360	352/352	8/8	8/8
43	90	360/360	306/300	54/60	54/60
44	90	360/360	345/351	15/9	15/9
45	87	348/348	300/322	48/26	60/38
46	90	360/360	360/260	0/0	0/0
47	85	340/340	305/310	35/30	55/50
48	90	360/360	203/205	157/155	157/155
49	89	356/356	236/236	120/120	124/124
50	90	360/360	316/316	44/44	44/44
51	89	356/356	281/281	75/75	79/79
52	90	360/360	360/360	0/0	0/0
53	-	-	-	-	-
54	90	360/260	336/334	24/26	24/26
55	-	-	-	-	-
56	90	360/360	340/340	20/20	20/20
57	90	360/360	355/354	5/6	5/6
58	90	360/360	360/360	0/0	0/0
59	87	348/348	340/340	8/8	12/12
60	90	360/360	338/338	22/22	22/22
61	89	356/356	349/351	7/5	11/9
62	90	360/360	348/348	12/12	12/12
63	90	360/360	360/360	0/0	0/0
64	83	332/332	306/308	26/24	54/52
65	90	360/360	360/360	0/0	0/0
66	90	360/360	360/360	0/0	0/0
67	-	-	-	-	-
68	90	360/360	328/326	32/34	32/34
69	90	360/360	336/336	24/24	24/24
70	-	-	-	-	-

## Sheet: Groups and ages
Group A	Age			Group B	Age
2	19			1	23
5	33			3	26
6	25			4	22
9	20			7	27
10	23			8	27
11	23			12	22
14	38			13	30
15	29			17	18
16	37			18	32
20	33			19	23
21	35			22	31
27	37			23	26
28	26			24	37
29	32			25	37
30	38			26	29
33	34			31	20
34	36			32	23
35	20			37	35
36	34			39	31
38	40			40	26
41	38			43	39
42	43			44	36
46	21			45	19
48	30			47	30
49	30			50	35
51	22			52	38
56	30			54	24
59	22			57	25
60	32			58	33
61	36			62	21
63	44			64	26
68	20			65	20
				66	36
	30.625			69	30
	7.33419
	28,08 - 33,17				28.1471
					6.10083
					26,09 - 30,2

## Sheet: Morphology
Participant	Sample	Abnormal	Normal	Total
1	1	356	31	387
	2	387	21	408
	3	388	23	411
	4	398	19	417
	5	399	31	430
2	1	41	2	43
	2	65	5	70
	3	52	7	59
	4	33	4	37
	5
3	1	147	8	155
	2	245	29	274
	3	11	0	11
	4	81	17	98
	5	207	29	236
4	1	453	13	466
	2	504	11	515
	3	446	13	459
	4	390	12	402
	5	430	17	447
5	1	441	11	452
	2	404	13	417
	3	406	14	420
	4	400	36	436
	5	400	34	434
6	1	417	66	483
	2	366	60	426
	3	350	63	413
	4	364	58	422
	5	378	58	436
7	1	400	29	429
	2	409	21	430
	3	402	18	420
	4	409	11	420
	5	424	23	447
8	1	391	13	404
	2
	3	406	11	417
	4	399	20	419
	5	410	32	442
9	1	408	10	418
	2	395	20	415
	3	411	12	423
	4	474	15	489
	5	401	16	417
10	1	370	43	413
	2	326	25	351
	3	350	44	394
	4	180	22	202
	5	353	43	396
11	1	30	4	34
	2	427	61	488
	3	399	33	432
	4	364	36	400
	5	371	36	407
12	1	371	31	402
	2	14	2	16
	3	431	20	451
	4	367	43	410
	5	402	23	425
13	1	433	33	466
	2	386	31	417
	3	431	22	453
	4	425	12	437
	5	419	14	433
14	1	399	37	436
	2	413	18	431
	3	441	30	471
	4	377	21	398
	5	391	30	421
15	1	472	8	480
	2	380	11	391
	3	417	7	424
	4	450	13	463
	5	489	9	498
16	1	452	23	475
	2	359	12	371
	3	399	8	407
	4	367	13	380
	5	425	14	439
17	1	343	2	345
	2	348	3	351
	3	399	14	413
	4	449	8	457
	5	412	8	420
18	1	120	4	124
	2	183	7	190
	3	338	9	347
	4	339	14	353
	5
19	1	452	59	511
	2	375	31	406
	3	381	30	411
	4	358	28	386
	5	328	32	360
20	1
	2
	3
	4
	5
21	1	398	50	448
	2	394	38	432
	3	352	48	400
	4	372	52	424
	5	364	44	408
22	1
	2	411	24	435
	3	390	22	412
	4	343	22	365
	5	385	21	406
23	1	29	5	34
	2	38	6	44
	3	54	12	66
	4	18	3	21
	5	9	0	9
24	1	239	24	263
	2	127	11	138
	3	237	16	253
	4	164	11	175
	5	163	9	172
25	1	406	11	417
	2	451	14	465
	3	215	10	225
	4	486	19	505
	5	421	12	433
26	1	413	15	428
	2	393	13	406
	3	433	15	448
	4	391	12	403
	5	392	14	406
27	1	396	23	419
	2	385	20	405
	3	391	22	413
	4	449	26	475
	5	402	12	414
28	1	387	26	413
	2	385	23	408
	3	391	37	428
	4	439	18	457
	5	435	18	453
29	1
	2
	3
	4
	5
30	1	192	2	194
	2	165	2	167
	3	199	0	199
	4	52	0	52
	5	104	0	104
31	1	456	18	472
	2	414	20	434
	3	380	22	402
	4	406	21	427
	5	395	23	418
32	1	401	35	436
	2	380	27	407
	3	366	40	406
	4	390	31	421
	5	368	33	401
33	1	290	17	307
	2	302	13	315
	3	311	18	329
	4	316	16	332
	5	304	17	321
34	1	175	9	184
	2	251	11	262
	3	173	9	182
	4	325	8	333
	5	364	16	380
35	1	420	28	448
	2	412	10	422
	3	455	12	467
	4	388	14	402
	5	417	8	425
36	1	436	6	442
	2	409	8	417
	3	406	7	413
	4	522	21	543
	5	482	12	494
37	1	68	3	71
	2	369	20	389
	3	275	16	291
	4	642	30	672
	5	381	32	413
38	1	390	40	430
	2	407	34	441
	3	404	23	427
	4	368	37	405
	5	398	26	424
39	1	61	3	64
	2	117	5	122
	3	59	3	62
	4	237	12	249
	5
40	1	417	2	419
	2	399	1	400
	3	410	3	413
	4	366	4	370
	5	413	3	416
41	1	16	1	17
	2	168	5	173
	3	31	3	34
	4	391	11	402
	5	444	8	452
42	1	261	6	267
	2	117	1	118
	3	427	3	430
	4	27	0	27
	5	15	1	16
43	1	408	10	418
	2	223	12	235
	3	249	8	257
	4	73	5	78
	5	151	7	158
44	1	368	40	408
	2	436	28	464
	3	387	32	419
	4	191	16	207
	5	377	31	408
45	1	393	14	407
	2	370	12	382
	3	450	8	458
	4	402	13	415
	5	442	19	461
46	1	397	11	408
	2	400	8	408
	3
	4	442	8	450
	5	368	9	377
47	1	403	7	410
	2	415	6	421
	3	400	6	406
	4	395	5	400
	5
48	1	386	22	408
	2	381	20	401
	3	393	23	416
	4	416	20	436
	5	391	18	409
49	1	394	11	405
	2	391	9	400
	3	402	16	418
	4	393	9	402
	5	399	14	413
50	1	162	3	165
	2	395	5	400
	3	13	0	13
	4	248	6	254
	5	274	7	281
51	1	400	13	413
	2	391	12	403
	3	399	17	416
	4	402	16	418
	5	406	10	416
52	1	400	8	408
	2	442	10	452
	3	454	5	459
	4	432	12	444
	5	433	12	445
53	1
	2
	3
	4
	5
54	1
	2
	3
	4
	5
55	1
	2
	3
	4
	5
56	1	405	16	421
	2	4332	23	455
	3	402	17	419
	4	23	1	24
	5	15	1	16
57	1	381	24	405
	2	404	16	420
	3	406	25	431
	4	385	15	400
	5	392	13	405
58	1	398	18	416
	2	339	11	350
	3	390	10	400
	4	409	8	417
	5	394	7	401
59	1	370	30	400
	2	375	43	418
	3	365	39	404
	4	367	53	420
	5	382	37	419
60	1	399	17	416
	2	391	22	413
	3
	4	385	18	403
	5	396	29	425
61	1	425	14	439
	2	388	21	409
	3	390	19	409
	4	403	20	423
	5	374	26	400
62	1
	2	397	11	408
	3
	4	394	12	406
	5	411	13	424
63	1	379	35	414
	2	406	18	424
	3	405	21	426
	4	389	26	415
	5	374	27	401
64	1	392	16	408
	2
	3
	4
	5	377	24	401
65	1	156	14	170
	2
	3
	4	195	19	214
	5
66	1	383	17	400
	2	335	9	344
	3	157	5	162
	4	143	6	149
	5	224	6	230
67	1
	2
	3
	4
	5
68	1
	2	217	4	221
	3	144	4	148
	4	259	8	267
	5	152	6	158
69	1	0	0	0
	2	117	3	120
	3	85	2	87
	4	357	15	372
	5	226	22	448
